Bruce H. Alexander, Ph.D.,\* Harvey Checkoway, Ph.D.,† Sonia I. Nagahama, B.A., ‡  
Karen B. Domino, M.D., M.P.H.§

**Conclusions:** Substance abuse and suicide represent significant occupational hazards for anesthesiologists. New methods to combat substance abuse among anesthesiologists should be developed. (Key words: National Death Index; occupational mortality; physicians; substance abuse; suicide.)

This article is accompanied by an Editorial View. Please see: Berry AJ, Fleisher LA: New evidence for the existence of old problems. *ANESTHESIOLOGY* 2000; 93:919-21.

A formal evaluation of mortality risks to US anesthesiologists has not been undertaken since 1976. The mortality rate in physicians is lower than in the general population, primarily because of the low prevalence of cigarette smoking in these individuals, their higher frequency of health-oriented behaviors and practices, and the "healthy worker effect" (*i.e.*, a person must be relatively healthy to be working).<sup>6-11</sup> Therefore, the mortality rate of anesthesiologists was compared to that of general internists, a group of physicians who practice outside of the operating room environment. Also, internists are not exposed to chemicals and radiation that might influence mortality rate, such as may be experienced by pathologists and radiologists.

The cohort was assembled from the Physician Master File (PMF) maintained by the American Medical Association. The association keeps a record of all medical students and physicians in the country, independent of membership in the association. These data are primarily available for human resources estimates for the medical profession, and for verification of physician credentials. The PMF, one of the most complete central sources of information on physicians in the United States, contains demographic data and information pertaining to the individual's professional qualifications and training. The database includes an individual's name, date and place of birth, gender, race, citizenship and visa status, medical

Address reprint requests to Dr. Domino: Box 356540, Seattle, Washington 98195. Address electronic mail to: kdomino@u.washington.edu. Individual article reprints may be purchased through the Journal Web site, [www.anesthesiology.org](http://www.anesthesiology.org).

school graduated, date of graduation, dates of residencies, self-designated specialty, major professional activity, vital status, date of death for decedents, and last known address.

All physicians identified in the PMF with a self-designated primary specialty of anesthesiology or general internal medicine who were alive as of January 1, 1979, and who graduated from medical school before June 1, 1995, were eligible for inclusion in the cohort. Internists were chosen as a comparison specialty population because they have fairly similar training requirements but are not likely to spend significant amounts of time in the operating room. The PMF registered more than three times as many internists as anesthesiologists. Study resources did not permit the follow-up of all internists; thus, a stratified random sample of internists was chosen. The stratified random sample was selected by stratifying the internists by gender, decade of birth, and citizenship (US or non-US). The sample was chosen to match the distribution of anesthesiologists on these factors. The US citizenship category included native-born and naturalized citizens. Within each stratum a random number was assigned to each individual, and the stratum then was sorted by the random numbers. The targeted number of internists, equal to the number of anesthesiologists in the corresponding stratum, then was selected in sequence from this list.

Vital status for all cohort members was determined using the PMF designation. The PMF continually updates and confirms the vital status of physicians using multiple sources of information, including death certificate data, direct notification from families, copies of obituaries, state licensing boards, and local medical associations. Maintaining an updated vital status is an important function for the PMF in order to verify physician credentials. The underlying and contributing causes of death were obtained from the National Death Index (NDI) maintained by the National Center for Health Statistics. Since 1979, the NDI has gathered mortality statistics from vital registries in all 50 states and New York City, providing a mechanism by which vital status and cause of death can be determined for health research purposes. An individual is linked to the NDI using a probabilistic matching scheme based on name, gender, marital status, race, date and place of birth, and social security number.<sup>12,13</sup> Because the PMF provided vital status and dates of death, but not social security number, the decedents in the anesthesiology-internist cohort were linked to the NDI Plus database. The NDI Plus database is a newer service that provides cause of death information for known decedents, obviating the need to request all death certificates from the individual states.<sup>14</sup> The PMF provided the date of death, which improved the reliability of the matches to NDI Plus. NDI Plus gave the cause of death only for the best probabilistic match. A copy of the death certificate was requested from the state if the cause of

death was not clear from NDI Plus. If the initial match did not seem plausible, the death certificate for the next most probable match was requested. The underlying cause of death reported by the individual states to NCHS was used to classify cause of death in this study. If a link to NDI was not made, but the individual was reported as deceased with a date of death in the PMF, the cause of death was recorded as unknown.

The follow-up period for this cohort study began on January 1, 1979, the earliest date for which the NDI data are available, and continued through December 31, 1995. Follow-up for cohort members who graduated after January 1, 1979, began on their dates of medical school graduation. Date of graduation was estimated to be on June 1 of the reported year of graduation in the PMF. Pre-1979 graduates began follow-up period on January 1, 1979. Person-time was accrued until December 31, 1995, or the date of death for decedents. If only month and year of death were available, the date of death was coded to be on the first day of that month. If only the year of death was available the date of death was coded as January 1 of that year. Possible losses to follow-up, including physicians who moved out of the country and thus the reporting area of the NDI and PMF, were not identifiable.

#### Statistical Analysis

The all-cause and cause-specific mortality rate of anesthesiologists was compared to that of internists using methods for cohort studies.<sup>15,16</sup> The specific causes of death of prior interest included all malignant neoplasms (International Classification of Diseases, 9th Revision [ICD-9] 140–208), malignant neoplasms of the brain (ICD-9 191) and pancreas (ICD-9 157), leukemias (ICD-9 204–208), other hematopoietic malignancies (ICD-9 200–203), suicides (ICD-9 E950–E959), drug-related suicides (ICD-9 E950.0–E950.5), and drug-related deaths (ICD-9 304, E930–E949, E950.0–E950.5, E980.0–E980.5).

Cause-specific and all-cause standardized mortality ratios (SMRs) were computed for each specialty by gender using the Life Table Analysis System (Occupational Safety and Health, Cincinnati, OH) for personal computers.<sup>17</sup> This program tabulates the underlying causes of death and person-time of follow-up into age-, gender-, and race-specific strata. SMRs and 95% confidence intervals (CIs) were calculated using US cause-specific mortality rates as a reference. The classifications of specific cause of death were limited to those available in the reference data.

Rate ratios comparing the mortality rates of anesthesiologists to internists were estimated using Cox proportional hazards regression models.<sup>15</sup> The proportional hazards model is a mathematic model that directly compares the survival experience of two or more groups over time (internists and anesthesiologists, in this case), adjusting for potentially confounding variables. The ef-

fects of potentially confounding variables, including the matching criteria, decade of birth, gender, and US citizenship status, and race (white, nonwhite, missing), were included in the model if they changed the rate ratio estimates by more than 10%. Ninety-five percent CIs were computed to estimate sampling error. The proportional hazards model assumes that the hazard ratios are constant (proportional) over time for all strata. Because anesthesiologists are more validly compared with internists than with the US general population, and the methods for follow-up and cause of death determination are equivalent for internists and anesthesiologists, we place the most emphasis on results comparing anesthesiologists to internists.

To determine if the hazard ratios varied with the duration of the time in the profession, a surrogate measure of cumulative exposure in the operating room environment, the final Cox models for the brain and pancreatic cancers and leukemia were fit with year of graduation as an interaction term with the indicator for specialty, to determine whether the hazard ratios varied by the time since graduation. To evaluate the effect of drug abuse prevention programs in anesthesiology initiated in the 1980s,<sup>18</sup> the mortality rates from drug-related suicides and all drug-related deaths were compared for the periods before and after January 1, 1987. Poisson regression models<sup>15</sup> were fit to estimate the age-, gender-, and race (white *vs.* nonwhite)-adjusted rate ratios comparing anesthesiologists and internists before and after that date. Years of life lost before age 65 for both cohorts were calculated for all causes, suicides, drug-related suicides, and all drug-related deaths.

## Results

The PMF database identified 40,285 anesthesiologists who were alive as of January 1, 1979, and who had graduated from medical school before December 31, 1995. The same database identified 136,834 general internists who met the same criteria. The stratified random sample of internists yielded 40,269 for inclusion in the cohort. Excluded from the cohort were individuals with incompatible dates of birth, death, and graduation, leaving 40,242 anesthesiologists and 40,211 internists for the analysis (table 1). The distributions of age, gender, and race were similar for the anesthesiologists and the sampled general internists in the cohort (table 1). Women comprised approximately 18% of the entire cohort, but only 8.6% of the deaths in anesthesiologists and 9.1% of the deaths in internists, reflecting the relatively younger age of female physicians. Thirty-four percent of the total cohort was not classified by race because race was not always recorded in the PMF. The mean years of follow-up were nearly the same for anesthesiologists and internists (table 1). There were 2,458 deceased anesthesiologists and 2,376 deceased internists. The age at death

**Table 1. Characteristics of Anesthesiologists and Internal Medicine Physicians Included in the Cohort**

|                                   | Anesthesiologists |       | Internists |      |
|-----------------------------------|-------------------|-------|------------|------|
|                                   | N                 | %     | N          | %    |
| Total                             | 40,242            | 100   | 40,211     | 100  |
| Gender                            |                   |       |            |      |
| Men                               | 33,040            | 82.1  | 33,044     | 82.2 |
| Women                             | 7,202             | 17.9  | 7,167      | 17.8 |
| Race                              |                   |       |            |      |
| White                             | 20,507            | 51.0  | 20,094     | 50.0 |
| Black                             | 769               | 1.9   | 805        | 2.0  |
| Hispanic                          | 958               | 2.4   | 1,130      | 2.8  |
| Asian                             | 3,751             | 9.3   | 3,612      | 9.0  |
| Native American                   | 13                | <1.0  | 11         | <1.0 |
| Other                             | 539               | 1.3   | 712        | 1.8  |
| Missing                           | 13,705            | 34.1  | 13,847     | 34.4 |
| Deceased                          | 2,458             | 6.1   | 2,376      | 5.9  |
| Cause of death known              | 2,326             | 94.6  | 2,183      | 91.9 |
| Year of birth (mean)              |                   | 1944  |            | 1944 |
| Men                               |                   | 1944  |            | 1944 |
| Women                             |                   | 1947  |            | 1947 |
| Age at end of follow-up (mean)    |                   | 50.3  |            | 50.3 |
| Men                               |                   | 50.7  |            | 50.9 |
| Women                             |                   | 48.0  |            | 47.7 |
| Years of follow-up (mean)         |                   | 13.7  |            | 13.9 |
| Age at death for decedents (mean) |                   | 66.5† |            | 69.0 |

\*Percent of deceased. †  $P < 0.01$  anesthesiologists compared with internists.

for decedents was slightly lower for anesthesiologists ( $66.5 \pm 14.7$  years) compared with internists ( $69.0 \pm 14.5$  years,  $P < 0.01$ ; table 1). The cause of death was determined for 2,326 (94.6%) of the anesthesiologists and 2,183 (91.9%) of the internists.

The SMRs for major causes of death for male and female anesthesiologists and internists were nearly all well below 1, indicating the overall better health state experienced by physicians than the US general population (data for anesthesiologists are shown in table 2; data for internists are not shown). Exceptions were accidental poisoning and suicide. Male anesthesiologists experienced a 34% excess risk of death from an accidental poisoning compared with the general population (SMR = 1.34, 95% CI = 0.92-1.87; table 2). Female anesthesiologists did not experience an excess of accidental poisonings but did show an elevated risk of suicide (SMR = 1.68, 95% CI = 0.82-3.00; table 2), and the SMR for suicide in female internists also exceeded unity (SMR = 1.11; 95% CI = 0.44-2.27).

The proportional distribution of selected causes of death, including the causes of death of prior interest, are displayed in table 3. Heart disease, cancer, and other diseases of the circulatory system were the most frequent causes of death for both anesthesiologists and internists. There were no striking differences in the proportion of any type of cancer for anesthesiologists compared with internists.



**Table 2. Standardized Mortality Ratios for Major Causes of Death in Male and Female Anesthesiologists: 1979–1995**

| Cause of Death                                  | OBS   | EXP*    | SMR  | 95% CI    |
|-------------------------------------------------|-------|---------|------|-----------|
| <b>Men</b>                                      |       |         |      |           |
| All causes of death                             | 2,247 | 4,654.3 | 0.48 | 0.46–0.50 |
| All cancers                                     | 563   | 1,187.3 | 0.47 | 0.43–0.51 |
| Neoplasms of lymphatic and hematopoietic tissue | 85    | 109.5   | 0.78 | 0.61–0.95 |
| Accidents                                       | 130   | 260.1   | 0.50 | 0.41–0.59 |
| Accidental poisoning                            | 34    | 25.3    | 1.34 | 0.92–1.87 |
| Violence                                        | 98    | 193.3   | 0.51 | 0.41–0.61 |
| Suicide                                         | 92    | 115.0   | 0.80 | 0.64–0.98 |
| <b>Women</b>                                    |       |         |      |           |
| All causes of death                             | 211   | 437.4   | 0.48 | 0.41–0.55 |
| All cancers                                     | 84    | 136.5   | 0.62 | 0.49–0.76 |
| Neoplasms of lymphatic and hematopoietic tissue | 5     | 11.5    | 0.43 | 0.14–1.01 |
| Accidents                                       | 10    | 18.0    | 0.55 | 0.26–1.01 |
| Accidental poisoning                            | 1     | 1.8     | 0.54 | 0.01–2.97 |
| Violence                                        | 14    | 11.6    | 1.20 | 0.65–2.01 |
| Suicide                                         | 11    | 6.5     | 1.68 | 0.82–3.00 |

\* Based on rates for United States 1979–95.

CI = confidence interval; EXP = expected; OBS = observed; SMR = standardized mortality ratios.

The all-cause mortality rates for anesthesiologists and internists did not differ (RR = 1.03; table 3). The rate ratios for all cancers, brain cancer, and hematopoietic neoplasms did not differ from unity. The rate ratios for leukemia (RR = 1.26, 95% CI = 0.78–2.09) and pancreatic cancer (RR = 1.31, 95% CI = 0.84–2.00) were modestly elevated; however, the CIs were wide and overlapped unity. No variation in rate ratios by length of time in the profession was observed for any of these outcomes.

In contrast, mortality rates resulting from suicide, drug-related deaths, HIV-related deaths, and cerebrovascular disease were higher for anesthesiologists compared with internists (table 3). Anesthesiologists had a nearly 50% excess risk of suicide (RR = 1.45, 95% CI = 1.07–1.97,  $P = 0.016$ ), and the rate ratio for drug-related suicide was more than doubled (RR = 2.21, 95% CI = 1.33–3.66,  $P = 0.002$ ). Furthermore, if all drug-related deaths were combined, the difference between anesthesiologists and internists was even greater (RR = 2.79, 95% CI = 1.87–4.15,  $P < 0.001$ ). Anesthesiologists had a 50% increased risk of death from other external causes (RR = 1.53, 95% CI = 1.05–2.22,  $P = 0.021$ ). These included deaths caused by boating, bicycle, and airplane accidents; drowning; fire; and falls and other miscellaneous injuries. Anesthesiologists had an 80% higher risk of HIV-related deaths than internists (RR = 1.78, 95% CI = 1.08–2.94,  $P = 0.023$ ). The risk of death from viral hepatitis also was increased (RR = 4.06, 95% CI = 0.86–19.11), but this finding was based on a small number of deaths ( $n = 8$ ). Compared with internists, anesthesiologists were more likely to die from cerebrovascular disease (ICD-9 430–438) and unspecified heart failure;

however, death rates among anesthesiologists from other heart and circulatory disease were slightly lower than among internists. The majority of the difference in the rates for cerebrovascular disease was in “acute but ill-defined” cerebrovascular disease (ICD-9 436)—67 deaths in anesthesiologists and 35 in internists.

The gender-specific mortality differences in anesthesiologists and internists were similar to those of the entire cohort (table 4). Male anesthesiologists had higher relative rates of drug-related deaths (RR = 3.00, 95% CI = 1.96–4.62,  $P < 0.001$ ), HIV-related deaths (RR = 1.82, 95% CI = 1.09–3.02,  $P = 0.033$ ), viral hepatitis (RR = 7.98, 95% CI = 1.0–63.84,  $P = 0.05$ ), and other external causes (RR = 1.47, 95% CI = 1.00–2.15,  $P = 0.05$ ). The rate ratios for suicide were similar for males and females. Because there were only 211 and 217 deaths among women anesthesiologists and internists, respectively, the cause-specific analyses for women relied on sparse data; the estimates were unstable, resulting in large CIs.

Suicide and drug-related death rates are described further by years since graduation in figures 1 and 2. For all suicides and all drug-related deaths, the rates in anesthesiologists were higher compared with corresponding rates among internists, except for suicides in the first years after graduation. Suicide rates also generally increased with increasing years since graduation—that is, increasing age, a pattern seen for suicides in the general population (fig. 1). Conversely, the differences in rates for drug-related deaths (fig. 2) were greatest in the first years after graduation, and the rates generally declined for both specialties over time. There was no indication that the relative risk of death from drug-related causes among anesthesiologists changed after the education attempts in the 1980's. The relative risk for drug-related suicides and drug-related deaths in anesthesiologists compared with internists remained elevated for both time periods (table 5).

Anesthesiologists had a greater number of years of life lost before age 65 because of suicides, drug-related suicides, and drug-related deaths and a higher all-cause mortality rate than internists. The anesthesiologist cohort had 1,583 life-years lost because of suicide, compared with 994 life-years lost in the internist cohort. There were 2,108 life-years lost because of premature deaths from all drug related causes in anesthesiologists, compared with 715 life-years lost in internists. The excess in suicide and drug-related deaths accounted for most of the differences in years of life lost because of all-cause mortality in anesthesiologists (12,956 life-years lost) compared with internists (9,936 life-years lost).

## Discussion

In this cohort study of anesthesiologists and general internal medicine physicians, exposure to the operating

**Table 3. Age, Gender, and Race-adjusted Rate Ratios Comparing Anesthesiologists with Internists for All Causes and Selected Causes of Death**

|                                             | Anesthesiologists |        | Internists |        | RR    | 95% CI    |
|---------------------------------------------|-------------------|--------|------------|--------|-------|-----------|
|                                             | N                 | (%)    | N          | (%)    |       |           |
| All deaths                                  | 2,458             | (100)  | 2,376      | (100)  | 1.03  | 0.97–1.09 |
| All cancer                                  | 647               | (26.3) | 641        | (27.0) | 0.99  | 0.89–1.11 |
| Pancreatic cancer                           | 49                | (2.0)  | 37         | (1.6)  | 1.31  | 0.84–2.00 |
| Brain cancer                                | 28                | (1.1)  | 28         | (1.2)  | 1.00  | 0.59–1.69 |
| Respiratory cancer                          | 115               | (4.7)  | 121        | (5.1)  | 0.95  | 0.73–1.22 |
| Digestive cancer                            | 189               | (7.7)  | 166        | (7.0)  | 1.13  | 0.92–1.39 |
| Leukemia                                    | 37                | (1.5)  | 29         | (1.2)  | 1.26  | 0.78–2.09 |
| Hematopoietic                               | 53                | (2.2)  | 63         | (2.7)  | 0.82  | 0.57–1.19 |
| All heart disease                           | 749               | (30.5) | 794        | (33.4) | 0.94  | 0.85–1.04 |
| Ischemic heart disease                      | 549               | (22.3) | 611        | (25.7) | 0.90  | 0.80–1.01 |
| Hypertensive heart disease                  | 13                | (0.5)  | 19         | (0.8)  | 0.71  | 0.35–1.45 |
| Cardiomyopathy                              | 23                | (0.9)  | 28         | (1.2)  | 0.81  | 0.47–1.41 |
| Heart failure                               | 30                | (1.2)  | 18         | (0.8)  | 1.70  | 0.95–3.06 |
| Cerebrovascular disease                     | 147               | (6.0)  | 107        | (4.5)  | 1.39† | 1.08–1.79 |
| Other diseases of circulatory system        | 50                | (2.0)  | 55         | (2.3)  | 0.94  | 0.64–1.37 |
| HIV-related                                 | 43                | (1.8)  | 24         | (1.0)  | 1.78* | 1.08–2.94 |
| Diseases of digestive system                | 39                | (1.6)  | 29         | (1.2)  | 1.3   | 0.81–2.11 |
| COPD                                        | 52                | (2.1)  | 55         | (2.3)  | 0.97  | 0.34–1.24 |
| Pneumonia, influenza, bronchiolitis         | 51                | (2.1)  | 37         | (1.6)  | 1.44  | 0.94–2.19 |
| Chronic liver disease                       | 28                | (1.1)  | 21         | (0.9)  | 1.30  | 0.74–2.29 |
| Viral hepatitis                             | 8                 | (0.3)  | 2          | (0.1)  | 4.06  | 0.86–19.1 |
| Diabetes                                    | 41                | (1.7)  | 40         | (1.7)  | 1.02  | 0.66–1.57 |
| Renal disease                               | 11                | (0.4)  | 11         | (0.5)  | 1.01  | 0.44–2.34 |
| Mental disorders                            | 17                | (0.7)  | 17         | (0.7)  | 1.05  | 0.54–2.06 |
| Diseases of nervous system and sense organs | 56                | (2.3)  | 56         | (2.3)  | 0.99  | 0.68–1.44 |
| Alzheimer disease                           | 20                | (0.8)  | 21         | (0.9)  | 1.03  | 0.56–1.90 |
| Motor vehicle accidents                     | 38                | (1.6)  | 35         | (1.5)  | 1.08  | 0.68–1.70 |
| Suicide                                     | 103               | (4.2)  | 71         | (3.0)  | 1.45* | 1.07–1.97 |
| Drug-related suicide                        | 48                | (2.0)  | 22         | (0.9)  | 2.21† | 1.33–3.66 |
| All drug-related deaths                     | 91                | (3.7)  | 33         | (1.4)  | 2.79‡ | 1.87–4.15 |
| Homicide                                    | 9                 | (0.4)  | 11         | (0.5)  | 0.80  | 0.33–1.92 |
| Other external causes                       | 69                | (2.8)  | 45         | (1.9)  | 1.53* | 1.05–2.22 |

\*  $P \leq 0.05$ . †  $P < 0.01$ . ‡  $P < 0.001$ .

CI = confidence interval; COPD = chronic obstructive pulmonary disease; RR = rate ratio (an RR of unity [1.0] means no difference in death rate between anesthesiologists and general internists).

room environment was not found to increase the risk of death from cancer. Compared to internists, anesthesiologists had an increased risk of death from suicide, particularly suicide by drug overdose, drug-related death, cerebrovascular disease, and other external causes. The rates of drug-related death appear to be highest in more recent graduates. In addition, the risk of death from HIV and viral hepatitis also was increased in male anesthesiologists.

#### Methodologic Issues

Although the study results were drawn from a very large cohort that purportedly included all self-designated anesthesiologists, the results should be interpreted with reference to a number of limitations. The main limitation of the study is the relatively young age and short follow-up of the cohorts. The mean year of birth was 1944, with a mean follow-up of 13.7 years to a mean age of 50.3 years (table 1). As the risk of death from cancer increases with advanced age, further follow-up to the

typical cancer death ages (>65 years) is necessary to assess the true cancer risks of anesthesiologists.

The cohort of all anesthesiologists was compared with the cohort of a subset of general internists randomly sampled and matched for gender, decade of birth, and citizenship status. The randomization procedure was performed using standard techniques and resulted in a population with identical demographic characteristics as the anesthesiologist cohort (table 1). The study's general results would be similar if the entire internist cohort were studied, although statistical precision would be expected to be modestly improved with additional subjects.

Another limitation of this cohort mortality study is the ambiguity in identifying all decedents and classifying their causes of death correctly. The study relied on the PMF designation of vital status, which may be incomplete. The PMF designation of vital status was used (instead of searching the entire cohort using NDI) because of the absence of a unique identifier (i.e., social security number) for each member of the cohort. NDI

**Table 4. Gender-specific Frequency Distribution and Age and Race-adjusted Rate Ratios for All Causes and Selected Causes of Death Comparing Anesthesiologists with Internists**

|                                             | Men                    |                 |       |           | Women                  |                 |      |            |
|---------------------------------------------|------------------------|-----------------|-------|-----------|------------------------|-----------------|------|------------|
|                                             | Anesthesiologists<br>N | Internists<br>N | RR    | 95% CI    | Anesthesiologists<br>N | Internists<br>N | RR   | 95% CI     |
| All deaths                                  | 2,247                  | 2,159           | 1.03  | 0.97–1.10 | 211                    | 217             | 0.99 | 0.82–1.20  |
| All cancer                                  | 563                    | 563             | 0.98  | 0.88–1.11 | 84                     | 78              | 1.03 | 0.76–1.40  |
| Pancreatic cancer                           | 45                     | 36              | 1.24  | 0.80–1.92 | 4                      | 1               | 4.01 | 0.45–35.92 |
| Brain cancer                                | 24                     | 26              | 0.93  | 0.54–1.63 | 4                      | 2               | 1.92 | 0.35–10.48 |
| Respiratory cancer                          | 103                    | 111             | 0.92  | 0.70–1.20 | 12                     | 10              | 1.23 | 0.53–2.85  |
| Digestive cancer                            | 177                    | 151             | 1.16  | 0.94–1.44 | 12                     | 15              | 0.80 | 0.37–1.72  |
| Leukemia                                    | 33                     | 26              | 1.26  | 0.76–2.12 | 4                      | 3               | 1.30 | 0.29–5.83  |
| Hematopoietic                               | 52                     | 62              | 0.83  | 0.57–1.20 | 1                      | 1               | 0.99 | 0.06–5.84  |
| Heart disease                               | 713                    | 751             | 0.94  | 0.85–1.05 | 36                     | 43              | 0.93 | 0.60–1.45  |
| Ischemic heart disease                      | 528                    | 581             | 0.91  | 0.81–1.02 | 21                     | 30              | 0.78 | 0.44–1.36  |
| Hypertensive heart disease                  | 10                     | 17              | 0.60  | 0.28–1.32 | 3                      | 2               | 1.90 | 0.32–11.47 |
| Cardiomyopathy                              | 22                     | 26              | 0.84  | 0.47–1.48 | 1                      | 2               | 0.50 | 0.05–5.53  |
| Heart failure                               | 28                     | 18              | 1.57  | 0.87–2.85 | 2                      | 0               | §    |            |
| Cerebrovascular disease                     | 131                    | 92              | 1.43† | 1.10–1.87 | 16                     | 15              | 1.19 | 0.59–2.41  |
| Other diseases of circulatory system        | 46                     | 52              | 0.91  | 0.61–1.35 | 4                      | 3               | 1.53 | 0.34–6.89  |
| HIV-related disease                         | 42                     | 23              | 1.82* | 1.09–3.02 | 1                      | 1               | 0.99 | 0.06–15.86 |
| Diseases of digestive system                | 38                     | 27              | 1.36  | 0.83–2.23 | 1                      | 2               | 0.49 | 0.44–5.43  |
| COPD                                        | 49                     | 48              | 1.03  | 0.69–1.54 | 3                      | 7               | 0.47 | 0.12–1.81  |
| Pneumonia, influenza, bronchiolitis         | 49                     | 33              | 1.54  | 0.99–2.39 | 2                      | 4               | 0.55 | 0.10–2.99  |
| Chronic liver disease                       | 27                     | 19              | 1.38  | 0.77–2.48 | 1                      | 2               | 0.51 | 0.05–5.69  |
| Viral hepatitis                             | 8                      | 1               | 7.98* | 1.0–63.84 | 0                      | 1               | §    |            |
| Diabetes                                    | 40                     | 38              | 1.04  | 0.67–1.63 | 1                      | 2               | 0.49 | 0.04–5.34  |
| Renal disease                               | 10                     | 10              | 1.02  | 0.42–2.45 | 1                      | 1               | 0.99 | 0.06–15.79 |
| Mental disorders                            | 14                     | 17              | 0.86  | 0.43–1.75 | 3                      | 0               | §    |            |
| Diseases of nervous system and sense organs | 52                     | 52              | 1.04  | 0.71–1.53 | 4                      | 4               | 1.03 | 0.26–4.12  |
| Alzheimer disease                           | 17                     | 21              | 0.87  | 0.46–1.65 | 3                      | 0               | §    |            |
| Motor vehicle accidents                     | 33                     | 30              | 1.09  | 0.67–1.79 | 5                      | 5               | 0.98 | 0.28–3.39  |
| Suicide                                     | 92                     | 64              | 1.44* | 1.05–1.98 | 11                     | 7               | 1.50 | 0.58–3.88  |
| Drug-related suicide                        | 42                     | 18              | 2.37† | 1.37–4.12 | 6                      | 4               | 1.43 | 0.40–5.08  |
| All drug-related deaths                     | 83                     | 28              | 3.00‡ | 1.96–4.62 | 8                      | 5               | 1.53 | 0.50–4.67  |
| Homicide                                    | 6                      | 9               | 0.65  | 0.23–1.82 | 3                      | 2               | 1.47 | 0.25–8.8   |
| Other external causes                       | 65                     | 44              | 1.47* | 1.00–2.15 | 4                      | 1               | 4.01 | 0.45–35.95 |

\*  $P \leq 0.05$ . †  $P < 0.01$ . ‡  $P < 0.001$ . § RR not calculated because of  $n = 0$  in either group.

CI = confidence interval; COPD = chronic obstructive pulmonary disease; RR = rate ratio (an RR of unity [1.0] means no difference in death rate between anesthesiologists and general internists).

searches result in a large number of false positives, especially in the absence of a social security number.<sup>12,13</sup> It is likely that vital status classification using the PMF may be less reliable for physicians who trained or once practiced in the United States but are no longer in the country and thus are not tracked actively for the PMF. Furthermore, information from the NDI would not be available for those who died outside of the United States. The extent to which this differed between anesthesiologists and internists, if at all, is unknown. Drawing a sample of internists matched on US citizenship was done to minimize this effect.

The proper classification of cause of death relied on a positive match with the NDI. The availability of the NDI Plus and an estimated date of death improved the probability of finding an exact match. The NDI has a high

sensitivity (92–98%) with matches, even in the absence of a social security number, as long as name and complete date of birth are used.<sup>12,13</sup> The availability of NDI Plus and an estimated date on death improved the probability of an exact match. In our study, differentiation between true and false positives was made by manual review of each record and their matches (comparing name, birth date, sex, birth place, date of death, and state of death). Death certificate requests were sent to the state vital statistics offices to confirm questionable matches identified during the manual review.

Although matching of known decedents by the NDI was quite successful, 132 anesthesiologists (5.4%) and 193 internists (8.1%) were not coded for cause of death. Had these been correctly classified, the observed rate ratios may have been reduced modestly, if the distribu-

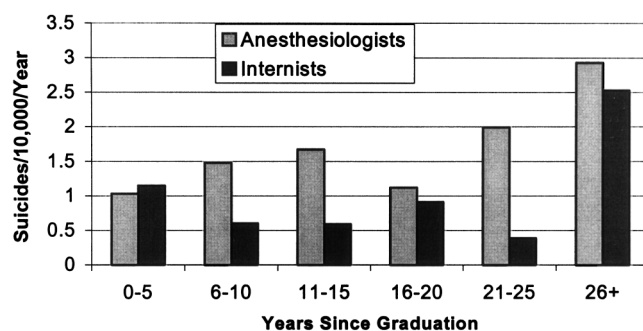

Fig. 1. Suicides per 10,000 person-years by years since graduation for anesthesiologists and internal medicine physicians.

tion of causes of the uncoded deaths were different for deaths of known causes (because of the greater number of uncoded deaths of internists).

It is also important to recognize that the complexities of the operating room environment make it difficult to identify specific causative agents or work conditions. We classified exposure by the surrogate measure of the duration of time within the profession and evaluated whether the hazard ratio for several cancers and suicide varied with time since graduation. We were unable to quantify specific exposures to trace anesthetic gases, stress and irregular hours, radiation, and other hazards that might be present within the operating room environment. In addition, differences in personal habits, lifestyle, and psychological profiles between anesthesiologists and internists could not be evaluated in this study. There also may be a bias related to ethnic background. The only available measure of ethnicity was self-designated race. This information was missing for about 34% of the cohort; however, in those for whom it was reported, the racial distribution between the two specialties was similar (table 1). An increased risk in anesthesiologists may be caused by these personal factors rather than occupational exposure.

Finally, this study reports comparisons of the mortality experience between anesthesiologists and general internal medicine specialists for a number of diseases. It is possible that because of the number of comparisons made some of the differences in mortality risks occurred by chance.

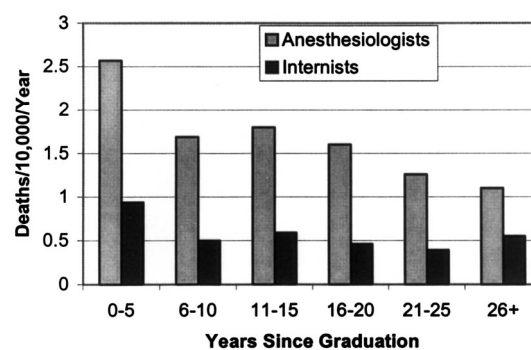

Fig. 2. All drug-related deaths per 10,000 person-years by years since graduation for anesthesiologists and internal medicine physicians.

### Mortality Risk

**Comparison with General Population.** Overall, anesthesiologists and general internists had lower mortality rates than the general population, as evidenced by SMRs well below unity (table 2). The only exceptions were increased rates of suicide in female anesthesiologists and accidental poisonings among male anesthesiologists. Although the low SMRs may result partially from the incomplete ascertainment of deaths in the cohorts, the SMR findings are consistent with prior studies.<sup>6-11</sup> The low mortality rates primarily reflect the higher socioeconomic class of physicians, a better health-related lifestyle, and the "healthy worker effect."<sup>6-11</sup> The rate of cigarette smoking-related diseases was especially low in the physician population, as has been reported in the past.<sup>6-11</sup>

**Comparison of Anesthesiologists with General Internists.** The comparison of mortality risks of anesthesiologists *versus* general internists did not show any increase in risk of death in anesthesiologists caused by cancer. This finding is also consistent with older studies of US anesthesiologists<sup>3,4</sup> and more recent studies of anesthesiologists in the United Kingdom.<sup>9,10</sup> However, the incidence of cancer generally increases with advanced age and a longer length of exposure to potential carcinogens. Therefore, it is possible that the modest increased risk of death from pancreatic cancer (31%) and leukemia (26%) observed in this study might become

Table 5. Relative Rate Ratios for Drug and Suicide Deaths Comparing Anesthesiologists with Internists before and after January 1, 1987

|                         |       | Anesthesiologists<br>(N) | Internists<br>(N) | RR*  | 95% CI    |
|-------------------------|-------|--------------------------|-------------------|------|-----------|
| All drug-related deaths | <1987 | 36                       | 14                | 2.65 | 1.42-4.91 |
|                         | ≥1987 | 55                       | 19                | 2.87 | 1.71-4.84 |
| Drug-related suicides   | <1987 | 16                       | 11                | 1.48 | 0.69-3.20 |
|                         | ≥1987 | 32                       | 11                | 2.88 | 1.45-5.71 |
| Suicides                | <1987 | 41                       | 33                | 1.25 | 0.79-1.97 |
|                         | ≥1987 | 62                       | 38                | 1.60 | 1.07-2.39 |

\* Ratio (RR) of anesthesiologists compared with internists for that time period. RR is adjusted for age, gender, and race.

CI = confidence interval.



more pronounced, or possibly vanish, if the cohort were followed for another 10 to 20 years.

Male anesthesiologists had increased risks of death from HIV (RR = 1.82) and viral hepatitis (RR = 7.98) compared with internists (table 4). The increase in risk of death from hepatitis is consistent with earlier studies suggesting an increased rate of hepatic disease in anesthesiologists.<sup>2,5,9</sup> Although our study is not able to determine whether these deaths resulted from lifestyle or occupational exposures because the 80% increase in HIV occurred primarily in males (42/43 cases) and the eight-fold increase in hepatitis occurred exclusively in males, it is likely that these cases represented a lifestyle exposure. However, anesthesiologists are believed to be at higher occupational risk for HIV and hepatitis than physicians with lower exposure rates to blood and body secretions because percutaneous injuries are common among anesthesiologists.<sup>19,20</sup>

Our finding of increased rates of suicide and drug-related suicides in anesthesiologists compared with the general US population is consistent with the results of prior mortality studies comparing anesthesiologists with socioeconomic control subjects or the general population.<sup>1,3,4,9,10</sup> Physicians, especially female physicians, have increased rates of suicide compared with the general population.<sup>7,9,11,21,22</sup> Our study also showed an increased risk of suicide (RR = 1.45), especially drug-related suicide (RR = 2.21), in anesthesiologists compared with internists (table 3). In addition, the 2.8-fold increase risk in all drug-related deaths in anesthesiologists compared with internists may represent additional suicides because suicide may have been concealed.

Although anesthesiologists and internists have similar rates of use of psychoactive substances,<sup>23,24</sup> anesthesiologists may be more likely to use parenteral opioids and more frequently obtained drugs from the workplace than other physicians.<sup>25</sup> The prevalence of opioid drug abuse among anesthesiology residents and practitioners was estimated at 1–3%.<sup>26,27</sup> Anesthesiologists were estimated to represent between 9 and 13% of the physicians in drug treatment programs; fewer than 4% of all physicians are anesthesiologists.<sup>25,27,28</sup> The success rate for resident reentry into anesthesiology among parenteral opioid abusers was poor, with death occurring as the initial relapse symptom in 16% (13/79) of parenteral opioid users who were allowed to reenter the training.<sup>29</sup>

Differences in rates of drug-related deaths and drug-related suicides between anesthesiologists and internists were greatest during the first 5 years after graduation; the rates generally declined for both specialties over time (fig. 2). This may reflect the increased use of fentanyl and parenteral opioids in anesthesiology residents, in contrast to the more slowly addicting sedatives and oral opioids used by older general internists. Substance abusers in anesthesiology have been found to be younger than other physician abusers.<sup>23</sup> Premature deaths of younger

anesthesiologists from all drug-related causes resulted in over 2,000 years of life lost before age 65, compared with 715 life-years lost in internists. The lower age of death of anesthesiologist decedents (table 1) also is attributed to the excess mortality rate from suicide and drug-related deaths in anesthesiologists. Our results therefore suggest that substance abuse and suicide represent significant occupational risks for anesthesiologists.

Despite increased awareness of the potential for substance abuse and education efforts,<sup>18</sup> our study found that the relative risk for drug-related deaths for anesthesiologists remained elevated after 1987 despite the introduction of educational programs in academic medical centers (table 5). This result suggests that current preventive and educational efforts concerning drug abuse should be evaluated. Because the mortality rate does not include many nonfatal cases of drug abuse and therefore represents only the “tip of the iceberg,” enhanced preventive measures are especially important.

Our study found modestly increased rates of death from cerebrovascular disease (RR = 1.39; table 3). Most of the cerebrovascular disease represented “acute but ill-defined” disease. Increased mortality rates from cerebrovascular disease have not been observed in prior mortality studies of anesthesiologists<sup>1,3,4,9,10</sup> and are unlikely to be related to the operating room environment. Death rates from other heart and circulatory diseases, including ischemic heart disease, hypertensive heart disease, and cardiomyopathy were lower in anesthesiologists; thus the mortality rate from all types of heart disease was not different from that in internists (table 3). The small increase in unspecified heart failure may represent a misclassification of these other disorders.

## Conclusions

The risk of cancer was not increased in anesthesiologists compared with internists. However, further follow-up to the typical cancer death ages is needed to assess the true cancer risks. Compared with internists, anesthesiologists had an increased risk of death from suicide, particularly suicide by drug overdose, and drug-related death. Male anesthesiologists had a higher risk of death from HIV and viral hepatitis, which may be related to lifestyle. The results suggest that continued attention to substance abuse among anesthesiologists is warranted.

The authors thank Emily A. Anderson, B.S., and John Campos, M.A., for their expert technical assistance; Trina Sterry and Jacqueline K. Sauer for their secretarial assistance (University of Washington, Seattle, Washington) and the American Medical Association for use of the Physician Master File and National Death Index (Division of Vital Statistics, National Center for Health Statistics, Centers of Disease Control and Prevention, Hyattsville, Maryland) for determination of cause of death. In addition, death certificates were obtained directly from Arizona, California, Colorado, Florida, Georgia, Hawaii, Illinois, Iowa, Louisiana, Maryland, Michigan, Minnesota, New Jersey, New York City, New York State, Ohio, Pennsylvania, Puerto Rico, Rhode Island, Texas, US Virgin Islands, and Wisconsin.



## References

1. Bruce DL, Eide KA, Linde HW, Eckenhoff JE: Causes of death among anesthesiologists: A 20-year survey. *ANESTHESIOLOGY* 1968; 29:565-9
2. Ad Hoc Committee on the Effect of Trace Anesthetics on the Health of Operating Room Personnel, American Society of Anesthesiologists: Occupational disease among operating room personnel: A national study. *ANESTHESIOLOGY* 1974; 41:321-40
3. Bruce DL, Eide KA, Smith, NJ, Seltzer F, Dykes MHM: A prospective survey of anesthesiologist mortality, 1967-1971. *ANESTHESIOLOGY* 1974; 41:71-4
4. Lew EA: Mortality experience among anesthesiologists, 1954-1976. *ANESTHESIOLOGY* 1979; 51:195-9
5. Buring JE, Hennekens CH, Mayrent SL, Rosner B, Greenberg ER, Colton T: Health experiences of operation room personnel. *ANESTHESIOLOGY* 1985; 62:325-30
6. Araki S, Murata K, Kumagai K, Nagasu M: Mortality of medical practitioners in Japan: Social class and the "healthy worker effect". *Am J Ind Med* 1986; 10:91-9
7. Rimpelä AH, Nurminen MM, Pulkkinen PO, Rimpelä MK, Valkonen T: Mortality of doctors: Do doctors benefit from their medical knowledge? *Lancet* 1987;i:84-6
8. Ullmann D, Phillips RL, Beeson WL, Dewey HG, Brin BN, Kuzma JW, Mathews CP, Hirst AE: Cause-specific mortality among physicians with differing life-styles. *JAMA* 1991; 265:2352-9
9. Carpenter LM, Swerdlow AJ, Fear NT: Mortality of doctors in different specialties: Findings from a cohort of 20,000 NHS hospital consultants. *Occup Environ Med* 1997; 54:388-95
10. Neil HAW, Fairer JG, Coleman MP, Thurston A, Vessey MP: Mortality among male anaesthetists in the United Kingdom, 1957-83. *Br Med J* 1987; 295:360-2
11. Juel K, Mosbech J, Hansen ES: Mortality and causes of death among Danish medical doctors 1973-1992. *Int J Epidemiol* 1999; 28:456-60
12. Williams BC, Demitrack LB, Fries BE: The accuracy of the National Death Index when personal identifiers other than social security number are used. *Am J Public Health* 1992; 82:1145-7
13. Wentworth DN, Neaton JD, Rasmussen WL: An evaluation of the Social Security Administration Master Beneficiary Record file and National Death Index in the ascertainment of vital status. *Am J Public Health* 1983; 73:1270-4
14. Sathiakumar N, Delzell E, Abdalla O: Using the National Death Index to obtain underlying cause of death codes. *J Occup Environ Med* 1998; 40:808-13
15. Breslow NE, Day NE: Statistical Methods in Cancer Research, Volume II: The Design and Analysis of Cohort Studies. New York, IARC Scientific Publications, Oxford University Press, 1987, pp 1-406
16. Checkoway H, Pearce N, Dement JM: Design and conduct of occupational epidemiology studies: II. Design aspects of cohort studies. *Am J Ind Med* 1989; 15:375-394
17. Steenland K, Spaeth S, Cassinelli R II, Laber P, Chang L, Koch K: NIOSH life table program for personal computers. *Am J Ind Med* 1998; 34:517-8
18. Lecky JH, Aukburg SJ, Conahan III TJ, Geer RT, Ominsky AJ, Gross J, Muravchick S, Wollman H: A departmental policy addressing chemical substance abuse. *ANESTHESIOLOGY* 1986;65:414-7
19. Greene ES, Berry AJ, Jagger J, Hanley E, Arnold WP III, Bailey MK, Brown M, Gramling-Babb P, Passannante AN, Seltzer JL, Southorn P, Van Clief MA, Venezia RA: Multicenter study of contaminated percutaneous injuries in anesthesia personnel. *ANESTHESIOLOGY* 1998; 89:1362-72
20. Kristensen MS, Sloth E, Jensen TK: Relationship between anesthetic procedure and contact of anesthesia personnel with patient body fluids. *ANESTHESIOLOGY* 1990; 73:619-24
21. Blachly PH, Osterud HT, Josslin R: Suicide in professional groups. *N Engl J Med* 1963; 268:1278-82
22. Steppacher RC, Mausner JS: Suicide in male and female physicians. *JAMA* 1974; 228:323-8
23. Lutsky I, Hopwood M, Abram SE, Cerletty JM, Hoffman RG, Kampine JP: Use of psychoactive substances in three medical specialties: Anaesthesia, medicine and surgery. *Can J Anaesth* 1994; 41:561-7
24. Hughes PH, Baldwin DC, Sheehan DV, Conard S, Storr CL: Resident physician substance use, by specialty. *Am J Psychiatry* 1992; 149:1348-54
25. Talbott GD, Gallegos KV, Wilson PO, Porter TL: The Medical Association of Georgia's Impaired Physicians Program: Review of the first 1000 physicians. *Analysis of specialty. JAMA* 1987; 257:2927-30
26. Ward CF, Ward GC, Saidman LJ: Drug abuse in anesthesia training programs: A survey. 1970 through 1980. *JAMA* 1983; 250:922-5
27. Gravenstein JS, Kory WP, Marks RG: Drug abuse by anesthesia personnel. *Anesth Analg* 1983; 62:467-72
28. Gallegos KV, Browne CH, Veit FW, Talbott GD: Addiction in anesthesiologists: Drug access and patterns of substance abuse. *Qual Rev Bull* 1988; 14:116-22
29. Menk EJ, Baumgarten RK, Kingsley CP, Culling RD, Middaugh R: Success of reentry into anesthesiology training programs by residents with a history of substance abuse. *JAMA* 1990; 263:3060-2
